# Supplementary material
Source: Research Square preprint supplement (doi:10.21203/rs.3.rs-9105735/v1)
Supplement: Supplementary file 1 [file effcfb609f45fcb019d5ca52.pdf]

## Supplementary Information

**Article title:** A smart toilet for home monitoring in patients with ulcerative colitis: an exploratory pilot study

**Journal:** Journal of Medical Systems

**Authors:** L.R. Hazeleger, V. Verbiest, A. Steijlen, J. Hamers, A. van Kraaij, E. Wentink, M. Duijvestein

**Corresponding author:** L.R. Hazeleger ([lotte.hazeleger@radboudumc.nl](mailto:lotte.hazeleger@radboudumc.nl))

This supplementary file includes additional tables, figures and plots regarding the smart toilet system, its feasibility and validity, and additional information on study participants.

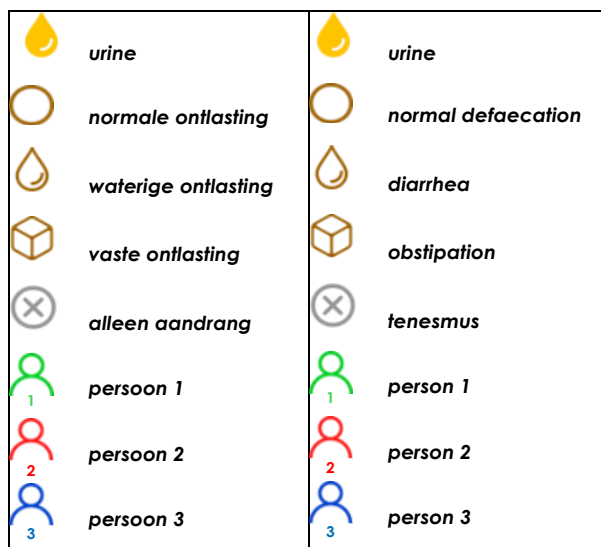

Figure S1: Remote buttons of the smart toilet system in Dutch (left) and English translation (right)

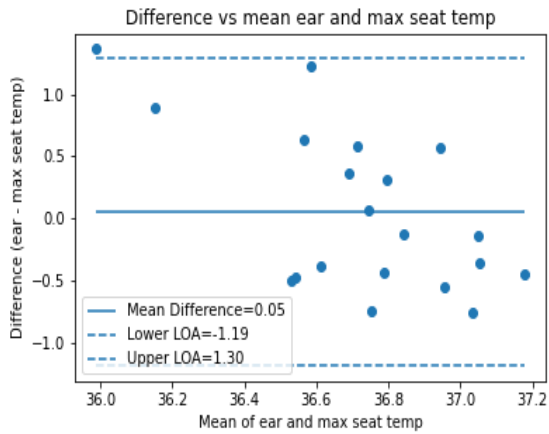

Figure S2: Bland Altman analysis of smart toilet temperature compared to ear temperature

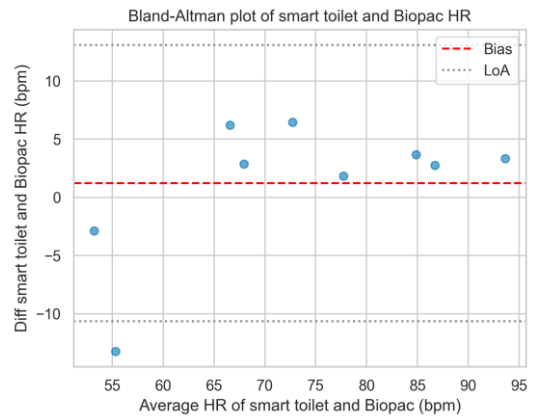

Figure S2: Bland Altman analysis of smart toilet heart rate compared to Biopac HR

Table S1: Identified and hypothesized reasons for inaccurate temperature recordings with the Melexis MLX90640AA sensor incorporated in the smart toilet

| Identified reasons for inaccuracy                      | Hypothesized reasons for inaccuracy |
|--------------------------------------------------------|-------------------------------------|
| Clothing                                               | Ambient temperature                 |
| User sitting position + sensor accuracy (see Figure S) | User movement                       |
| Dirty sensor                                           | Body surface area                   |
|                                                        | Ambient humidity                    |

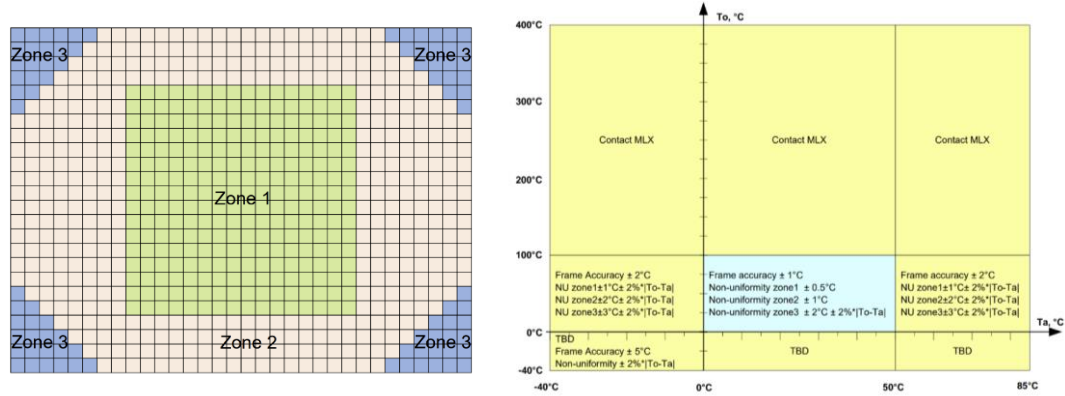

Figure S4 Accuracy zones (left) and absolute temperature accuracy (right) of the temperature sensor [from Melexis MLX90640AA Datasheet]

Table S2: Induction treatment regimen per patient

| Pt | Induction therapy (start week)                                           |
|----|--------------------------------------------------------------------------|
| 1  | Rectal corticosteroids (0), filgotinib (2)                               |
| 2  | Oral (0) and rectal (2) corticosteroids, mesalamine (0), vedolizumab (3) |
| 3  | Filgotinib (0)                                                           |
| 4  | Rectal corticosteroids (0), upadacitinib (1)                             |
| 5  | Upadacitinib (0)                                                         |
| 6  | Ustekinumab (1)                                                          |
| 7  | Oral corticosteroids (1), azathioprine (4)                               |
| 8  | Vedolizumab (3)                                                          |

Table S3: Nature of visits to the smart toilet as indicated by patients

| Patient | Defaecation |         |     |        |      |      |
|---------|-------------|---------|-----|--------|------|------|
|         | Total       | Miction | All | Normal | Soft | Hard |
| 1       | 200         | 74      | 126 | 122    | 4    | 0    |
| 2       | 282         | 264     | 84  | 21     | 65   | 43   |
| 3       | 243         | 155     | 94  | 78     | 7    | 9    |
| 4       | 353         | 339     | 27  | 24     | 2    | 2    |
| 5       | 198         | 122     | 57  | 44     | 9    | 5    |
| 6       | 285         | 231     | 60  | 1      | 58   | 2    |
| 7       | 44          | 1       | 3   | 0      | 1    | 2    |
| 8       | 130         | 31      | 26  | 17     | 7    | 2    |

Table S4: Availability of good-quality ECG recordings as determined by SQI model

| Patient | Good quality ECG recordings  |     |    |
|---------|------------------------------|-----|----|
|         | Recorded smart toilet visits | N   | %  |
| 1       | 200                          | 167 | 84 |
| 2       | 282                          | 215 | 76 |
| 3       | 243                          | 179 | 74 |
| 4       | 353                          | 285 | 81 |
| 5       | 198                          | 121 | 61 |
| 6       | 285                          | 209 | 73 |
| 7       | 44                           | 10  | 23 |
| 8       | 130                          | 107 | 82 |

UC: ulcerative colitis; ECG: electrocardiogram

Table S5: Availability of temperature recordings with the smart toilet

| Patient | Recorded smart toilet visits | Temperature measurements |    |
|---------|------------------------------|--------------------------|----|
|         |                              | N                        | %  |
| 1       | 200                          | 161                      | 81 |
| 2       | 282                          | 237                      | 84 |
| 3       | 243                          | 99                       | 41 |
| 4       | 353                          | 92                       | 26 |
| 5       | 198                          | 113                      | 57 |
| 6       | 285                          | 198                      | 69 |
| 7       | 44                           | 26                       | 59 |
| 8       | 130                          | 109                      | 84 |

UC: ulcerative colitis ECG: electrocardiogram
